# Supplementary material for: Yeast Diversity Associated with the Phylloplane of Corn Plants Cultivated in Thailand
Source: PubMed Central journal article supplement (PMC7022409; doi:10.3390/microorganisms8010080), 2020-01-07
Supplement: microorganisms-08-00080-s001.pdf [file microorganisms-08-00080-s001.pdf]

**Table S1.** Yeast species and isolates from corn leaf samples in each province.

| Taxa                                 | Strain DMKU-                            |                                                                 |                                                 |                                                |
|--------------------------------------|-----------------------------------------|-----------------------------------------------------------------|-------------------------------------------------|------------------------------------------------|
|                                      | Suphan Buri                             | Chainat                                                         | Nakhon Sawan                                    | Phetchabun                                     |
| <b>Phylum Ascomycota</b>             |                                         |                                                                 |                                                 |                                                |
| <b>Subphylum Saccharomycotina</b>    |                                         |                                                                 |                                                 |                                                |
| <i>Candida intermedia</i>            | CP563                                   | CP635,                                                          | CP669, CP705,<br>CP791                          | -                                              |
| <i>Candida quercitrusa</i>           | -                                       | -                                                               | -                                               | CP719                                          |
| <i>Candida saopaulonensis</i>        | -                                       | CP793, CP802                                                    | -                                               | CP708, CP715                                   |
| <i>Candida uthaithanina</i>          | -                                       | CP825                                                           | -                                               | -                                              |
| <i>Meyerozyma caribbica</i>          | CP566, CP628                            | CP629, CP649,<br>CP813                                          | CP666, CP670,<br>CP679, CP696,<br>CP783         | CP710, CP724,<br>CP749, CP767,                 |
| <i>Kodamaea ohmeri</i>               | CP586                                   | -                                                               | -                                               | -                                              |
| <i>Metschnikowia lophuriensis</i>    | -                                       | CP816                                                           | CP680                                           | CP722                                          |
| <i>Pichia bruneiensis</i>            | -                                       | CP805, CP826                                                    | -                                               | CP733, CP737,<br>CP753, CP761                  |
| <i>Pichia kudriavzevii</i>           | CP565                                   |                                                                 | CP672                                           |                                                |
| <i>Wickerhamomyces anomalus</i>      | CP571, CP577                            | CP657                                                           | -                                               | -                                              |
| <b>Phylum Basidiomycota</b>          |                                         |                                                                 |                                                 |                                                |
| <b>Subphylum Agaricomycotina</b>     |                                         |                                                                 |                                                 |                                                |
| <i>Dioszegia zsolttii</i>            | CP555                                   | CP647                                                           | CP780                                           | -                                              |
| <i>Hannaella oryzae</i>              | -                                       | -                                                               | CP701, CP775                                    | -                                              |
| <i>Hannaella pagnoccae</i>           | -                                       | CP636, CP810                                                    | -                                               | CP723                                          |
| <i>Hannaella phetchabunensis</i>     | -                                       | CP812                                                           | -                                               | -                                              |
| <i>Hannaella phyllophila</i>         | -                                       | CP648                                                           | CP667                                           | CP763                                          |
| <i>Hannaella siamensis</i>           | CP590                                   | CP631, CP822                                                    | -                                               | CP721, CP743                                   |
| <i>Hannaella sinensis</i>            | CP553, CP568,<br>CP595, CP606,<br>CP610 | CP630, CP637,<br>CP643, CP652,<br>CP655, CP792,<br>CP803, CP819 | CP665, CP668,<br>CP677, CP690,<br>CP703, CP787, | CP712, CP716,<br>CP728, CP742,<br>CP765        |
| <i>Vishiacozya aff. heimaeyensis</i> | CP576                                   | CP796                                                           | -                                               | -                                              |
| <i>Kwoniella bestiolae</i>           | CP619                                   | -                                                               | -                                               | -                                              |
| <i>Kwoniella heveanensis</i>         | -                                       | CP820                                                           | -                                               | -                                              |
| <i>Papiliotrema flavescens</i>       | CP611                                   | CP634, CP642,<br>CP654, CP806,<br>CP808                         | CP700, CP786                                    | CP714, CP720,<br>CP734, CP740,<br>CP760, CP768 |
| <i>Papiliotrema laurentii</i>        | CP560, CP567,<br>CP585                  | CP797                                                           | CP660                                           | -                                              |

Table S1. Cont

| Taxa                                  | Strain DMKU-                                                    |                               |                                         |                                                |
|---------------------------------------|-----------------------------------------------------------------|-------------------------------|-----------------------------------------|------------------------------------------------|
|                                       | Suphan Buri                                                     | Chainat                       | Nakhon Sawan                            | Phetchabun                                     |
| <i>Papiliotrema rajasthanensis</i>    | CP552, CP580,<br>CP592, CP603,<br>CP621                         | CP800, CP823                  | CP691, CP776,<br>CP790                  | CP754                                          |
| <i>Papiliotrema ruineniae</i>         | -                                                               | CP818                         | CP781                                   | -                                              |
| <i>Plapiliotrema plantarum</i>        | -                                                               | CP801                         | -                                       | -                                              |
| <i>Saitozyma flava</i>                | CP620                                                           | -                             | -                                       | CP758                                          |
| <b>Subphylum Pucciniomycotina</b>     |                                                                 |                               |                                         |                                                |
| <i>Cystobasidium calyptogenae</i>     | CP557                                                           | -                             | -                                       | -                                              |
| <i>Symmetrospora vermiculata</i>      | CP558                                                           | CP821                         | CP771                                   | -                                              |
| <i>Rhodotorula mucilaginosa</i>       | CP573, CP596                                                    | -                             | -                                       | -                                              |
| <i>Rhodotorula paludigena</i>         | CP572, CP591,<br>CP604, CP614,<br>CP625                         | CP640, CP645,<br>CP650, CP794 | CP659, CP693,<br>CP702, CP777,<br>CP785 | CP730, CP746,<br>CP752, CP757                  |
| <i>Rhodotorula toruloides</i>         | -                                                               | -                             | CP699                                   | -                                              |
| <i>Rhodotorula aff. toruloides</i>    | CP570                                                           | CP639                         | -                                       | -                                              |
| <i>Rhodosporeidiobolus nylandii</i>   | CP589                                                           | -                             | -                                       | -                                              |
| <i>Rhodosporeidiobolus ruineniae</i>  | -                                                               | -                             | CP694, CP706                            | CP713                                          |
| <i>Rhodosporeidiobolus fluviialis</i> | -                                                               | CP658                         | -                                       | -                                              |
| <i>Rhodosporeidiobolus odoratus</i>   | CP622                                                           | -                             | -                                       | -                                              |
| <i>Sporobolomyces blumeae</i>         | CP551, CP575,<br>CP601, CP605,<br>CP613                         | -                             | CP683, CP779                            | -                                              |
| <i>Sporobolomyces nakasei</i>         | -                                                               | -                             | -                                       | CP727, CP735,<br>CP741, CP751,<br>CP756, CP762 |
| <i>Sporobolomyces carnicolor</i>      | -                                                               | CP799                         | -                                       | CP707                                          |
| <b>Subphylum Ustilaginomycotina</b>   |                                                                 |                               |                                         |                                                |
| <i>Anthracoystis elionuri</i>         | CP623                                                           | CP646, CP809,<br>CP824        | CP675, CP784                            | -                                              |
| <i>Dirkmeia churashimaensis</i>       | CP554, CP562,<br>CP574, CP583,<br>CP593, CP608,<br>CP612, CP617 | CP638, CP644,<br>CP653, CP815 | CP661, CP692,<br>CP774, CP778           | CP709                                          |
| <i>Moesziomyces antarcticus</i>       | CP556, CP564,<br>CP624                                          | -                             | CP671, CP681,<br>CP684, CP697,<br>CP770 | CP726, CP745                                   |

**Table S1.** *Cont*

| Taxa                        | Strain DMKU-                                   |              |                        |              |
|-----------------------------|------------------------------------------------|--------------|------------------------|--------------|
|                             | Suphan Buri                                    | Chainat      | Nakhon Sawan           | Phetchabun   |
| <i>Ustilago trichophora</i> | CP626                                          | CP641        | -                      | -            |
| <i>Ustilago siamensis</i>   | CP597                                          | -            | -                      | -            |
| <i>Ustilago sparsa</i>      | CP569, CP579,<br>CP584, CP602,<br>CP607, CP615 | CP798, CP814 | CP663, CP698,<br>CP704 | CP725, CP732 |

**Table S2.** Sequence similarity analysis of the D1/D2 region of corn phylloplane yeasts and their closely related species.

| M13 profile | Strain with the same profile      | Representative strain | GenBank accession no. | Closest specie (GenBank accession no.)       | Nucleotide substitutions/gap/total nt | % identity | Identification                    |
|-------------|-----------------------------------|-----------------------|-----------------------|----------------------------------------------|---------------------------------------|------------|-----------------------------------|
|             | DMKU-                             | DMKU-                 |                       |                                              |                                       |            |                                   |
| 1           | CP563, CP635, CP669, CP705, CP791 | CP563                 | LC430847              | <i>Candida intermedia</i> (U44809)           | 2/1/475                               | 99.37      | <i>Candida intermedia</i>         |
|             |                                   | CP669                 | LC430848              | <i>Candida intermedia</i> (U44809)           | 2/1/481                               | 99.38      | <i>Candida intermedia</i>         |
| 2           | CP719                             | CP719                 | LC430849              | <i>Candida quercitrusa</i> (U45831)          | 3/2/529                               | 99.06      | <i>Candida quercitrusa</i>        |
| 3           | CP708, CP715, CP793               | CP715                 | LC430850              | <i>Candida saopaulonensis</i> (AY695398)     | 1/0/454                               | 99.78      | <i>Candida saopaulonensis</i>     |
|             |                                   | CP793                 | LC430851              | <i>Candida saopaulonensis</i> (AY695398)     | 1/1/502                               | 99.60      | <i>Candida saopaulonensis</i>     |
| 4           | CP802                             | CP802                 | LC430852              | <i>Candida saopaulonensis</i> (AY695398)     | 1/0/456                               | 99.78      | <i>Candida saopaulonensis</i>     |
| 5           | CP825                             | CP825                 | LC430853              | <i>Candida uthaithanina</i> (AB588752)       | 1/0/543                               | 99.82      | <i>Candida uthaithanina</i>       |
| 6           | CP628, CP666                      | CP628                 | LC430865              | <i>Meyerozyma caribbica</i> (AY187283)       | 1/0/533                               | 99.81      | <i>Meyerozyma caribbica</i>       |
| 7           | CP813, CP749, CP724               | CP724                 | LC430864              | <i>Meyerozyma caribbica</i> (AY187283)       | 1/0/533                               | 99.81      | <i>Meyerozyma caribbica</i>       |
| 8           | CP679, CP710, CP767               | CP679                 | LC430862              | <i>Meyerozyma caribbica</i> (AY187283)       | 1/0/533                               | 99.81      | <i>Meyerozyma caribbica</i>       |
| 9           | CP566                             | CP566                 | LC430858              | <i>Meyerozyma caribbica</i> (AY187283)       | 0/0/558                               | 100        | <i>Meyerozyma caribbica</i>       |
| 10          | CP629                             | CP629                 | LC430859              | <i>Meyerozyma caribbica</i> (AY187283)       | 1/1/544                               | 99.63      | <i>Meyerozyma caribbica</i>       |
| 11          | CP649, CP783                      | CP649                 | LC430860              | <i>Meyerozyma caribbica</i> (AY187283)       | 2/0/510                               | 99.61      | <i>Meyerozyma caribbica</i>       |
| 12          | CP670                             | CP670                 | LC430861              | <i>Meyerozyma caribbica</i> (AY187283)       | 2/2/534                               | 99.25      | <i>Meyerozyma caribbica</i>       |
| 13          | CP696                             | CP696                 | LC430863              | <i>Meyerozyma caribbica</i> (AY187283)       | 2/0/521                               | 99.62      | <i>Meyerozyma caribbica</i>       |
| 14          | CP586                             | CP586                 | LC430854              | <i>Kodamaea ohmeri</i> (GU597323)            | 1/0/430                               | 99.77      | <i>Kodamaea ohmeri</i>            |
| 15          | CP680, CP816                      | CP680                 | LC430855              | <i>Metschnikowia lophuriensis</i> (AB697756) | 0/0/406                               | 100        | <i>Metschnikowia lophuriensis</i> |
|             |                                   | CP816                 | LC430857              | <i>Metschnikowia lophuriensis</i> (AB697756) | 0/0/417                               | 100        | <i>Metschnikowia lophuriensis</i> |

Table S2. Cont

| M13 profile | Strain with the same profile | Representative strain | GenBank accession no. | Closest specie (GenBank accession no.)                                               | Nucleotide substitutions/gap/total nt | % identity     | Identification                                                     |
|-------------|------------------------------|-----------------------|-----------------------|--------------------------------------------------------------------------------------|---------------------------------------|----------------|--------------------------------------------------------------------|
|             | DMKU-                        | DMKU-                 |                       |                                                                                      |                                       |                |                                                                    |
| 16          | CP722                        | CP722                 | LC430856              | <i>Metschnikowia lopburiensis</i> (AB697756)                                         | 0/0/408                               | 100            | <i>Metschnikowia lopburiensis</i>                                  |
| 17          | CP761, CP733, CP805          | CP761                 | LC430868              | <i>Pichia bruneiensis</i> (KY108804)                                                 | 2/4/519                               | 95.95          | <i>Pichia bruneiensis</i>                                          |
| 18          | CP737                        | CP737                 | LC430866              | <i>Pichia bruneiensis</i> (KY108804)                                                 | 1/3/504                               | 96.03          | <i>Pichia bruneiensis</i>                                          |
| 19          | CP753                        | CP753                 | LC430867              | <i>Pichia bruneiensis</i> (KY108804)                                                 | 2/4/519                               | 95.95          | <i>Pichia bruneiensis</i>                                          |
| 20          | CP826                        | CP826                 | LC430869              | <i>Pichia bruneiensis</i> (KY108804)                                                 | 3/1/498                               | 95.98          | <i>Pichia bruneiensis</i>                                          |
| 21          | CP565                        | CP565                 | LC430870              | <i>Pichia kudriavzevii</i> (EF550222)                                                | 0/0/522                               | 100            | <i>Pichia kudriavzevii</i>                                         |
| 22          | CP672                        | CP672                 | LC430871              | <i>Pichia kudriavzevii</i> (EF550222)                                                | 0/0/524                               | 100            | <i>Pichia kudriavzevii</i>                                         |
| 23          | CP571, CP577                 | CP571<br>CP577        | LC430873<br>LC430874  | <i>Wickerhamomyces anomalus</i> (U74592)<br><i>Wickerhamomyces anomalus</i> (U74592) | 0/0/524<br>0/0/544                    | 100<br>100     | <i>Wickerhamomyces anomalus</i><br><i>Wickerhamomyces anomalus</i> |
| 24          | CP657                        | CP657                 | LC430872              | <i>Wickerhamomyces anomalus</i> (U74592)                                             | 2/0/534                               | 99.63          | <i>Wickerhamomyces anomalus</i>                                    |
| 25          | CP555, CP647                 | CP555<br>CP647        | LC428178<br>LC428179  | <i>Dioszegia zsolttii</i> (AF544245)<br><i>Dioszegia zsolttii</i> (AF544245)         | 1/0582<br>1/0533                      | 99.83<br>99.81 | <i>Dioszegia zsolttii</i><br><i>Dioszegia zsolttii</i>             |
| 26          | CP780                        | CP780                 | LC428180              | <i>Dioszegia zsolttii</i> (AF544245)                                                 | 1/0549                                | 99.82          | <i>Dioszegia zsolttii</i>                                          |
| 27          | CP701                        | CP701                 | LC428181              | <i>Hannaella oryzae</i> (AF075511)                                                   | 0/0/530                               | 100            | <i>Hannaella oryzae</i>                                            |
| 28          | CP775                        | CP775                 | LC428182              | <i>Hannaella oryzae</i> (AF075511)                                                   | 0/0/531                               | 100            | <i>Hannaella oryzae</i>                                            |
| 29          | CP636                        | CP636                 | LC428183              | <i>Hannaella pagnoccae</i> (FJ828959)                                                | 2/0557                                | 99.64          | <i>Hannaella pagnoccae</i>                                         |
| 30          | CP723, CP810                 | CP810                 | LC428184              | <i>Hannaella pagnoccae</i> (FJ828959)                                                | 0/0/550                               | 100            | <i>Hannaella pagnoccae</i>                                         |
| 31          | CP812                        | CP812                 | LC428185              | <i>Hannaella phetchabunensis</i> (AB922849)                                          | 0/0/543                               | 100            | <i>Hannaella phetchabunensis</i>                                   |
| 32          | CP648, CP667                 | CP648                 | LC428186              | <i>Hannaella phyllophila</i> (AB934929)                                              | 0/0/553                               | 100            | <i>Hannaella phyllophila</i>                                       |

Table S2. Cont.

| M13 profile | Strain with the same profile                                                                                   | Representative strain   | GenBank accession no.            | Closest specie (GenBank accession no.)                                                                            | Nucleotide substitutions/gap/total nt | % identity        | Identification                                                                                 |
|-------------|----------------------------------------------------------------------------------------------------------------|-------------------------|----------------------------------|-------------------------------------------------------------------------------------------------------------------|---------------------------------------|-------------------|------------------------------------------------------------------------------------------------|
|             | DMKU-                                                                                                          | DMKU-                   |                                  |                                                                                                                   |                                       |                   |                                                                                                |
| 33          | CP763                                                                                                          | CP763                   | LC428187                         | <i>Hannaella phyllophila</i> (AB934929)                                                                           | 0/0/549                               | 100               | <i>Hannaella phyllophila</i>                                                                   |
| 34          | CP631                                                                                                          | CP631                   | LC428188                         | <i>Hannaella siamensis</i> (AB922844)                                                                             | 0/0/504                               | 100               | <i>Hannaella siamensis</i>                                                                     |
| 35          | CP590, CP743, CP822                                                                                            | CP590<br>CP743          | LC428189<br>LC428190             | <i>Hannaella siamensis</i> (AB922844) <i>Hannaella siamensis</i> (AB922844)                                       | 0/0/561<br>0/0/516                    | 100<br>100        | <i>Hannaella siamensis</i><br><i>Hannaella siamensis</i>                                       |
| 36          | CP721                                                                                                          | CP721                   | LC428191                         | <i>Hannaella siamensis</i> (AB922844)                                                                             | 0/0/544                               | 100               | <i>Hannaella siamensis</i>                                                                     |
| 37          | CP742                                                                                                          | CP742                   | LC428201                         | <i>Hannaella sinensis</i> (AF189884)                                                                              | 0/0/538                               | 100               | <i>Hannaella sinensis</i>                                                                      |
| 38          | CP568, CP606, CP610, CP630, CP637, CP643, CP652, CP655, CP665, CP668, CP703, CP712, CP716, CP728, CP765, CP803 | CP568<br>CP652<br>CP728 | LC428192<br>LC428193<br>LC428200 | <i>Hannaella sinensis</i> (AF189884) <i>Hannaella sinensis</i> (AF189884)<br><i>Hannaella sinensis</i> (AF189884) | 0/0/578<br>0/0/526<br>0/0/516         | 100<br>100<br>100 | <i>Hannaella sinensis</i><br><i>Hannaella sinensis</i><br><i>Hannaella sinensis</i>            |
| 39          | CP787                                                                                                          | CP787                   | LC428195                         | <i>Hannaella sinensis</i> (AF189884)                                                                              | 0/0/532                               | 100               | <i>Hannaella sinensis</i>                                                                      |
| 40          | CP792                                                                                                          | CP792                   | LC428196                         | <i>Hannaella sinensis</i> (AF189884)                                                                              | 0/0/532                               | 100               | <i>Hannaella sinensis</i>                                                                      |
| 41          | CP819                                                                                                          | CP819                   | LC428197                         | <i>Hannaella sinensis</i> (AF189884)                                                                              | 0/0/554                               | 100               | <i>Hannaella sinensis</i>                                                                      |
| 42          | CP553, CP690                                                                                                   | CP553<br>CP690          | LC428198<br>LC428194             | <i>Hannaella sinensis</i> (AF189884) <i>Hannaella sinensis</i> (AF189884)                                         | 0/0/578<br>1/0/518                    | 100<br>99.81      | <i>Hannaella sinensis</i><br><i>Hannaella sinensis</i>                                         |
| 43          | CP595                                                                                                          | CP595                   | LC428199                         | <i>Hannaella sinensis</i> (AF189884)                                                                              | 0/0/549                               | 100               | <i>Hannaella sinensis</i>                                                                      |
| 44          | CP677                                                                                                          | CP677                   | LC428202                         | <i>Hannaella sinensis</i> (AF189884)                                                                              | 0/1/534                               | 99.81             | <i>Hannaella sinensis</i>                                                                      |
| 45          | CP576, CP796                                                                                                   | CP576<br>CP796          | LC370333<br>LC370334             | <i>Vishniacozyma heimaeyensis</i> (DQ000317)<br><i>Vishniacozyma heimaeyensis</i> (DQ000317)                      | 10/1/562<br>10/1/562                  | 98.04<br>98.04    | <i>Vishniacozyma</i> aff. <i>heimaeyensis</i><br><i>Vishniacozyma</i> aff. <i>heimaeyensis</i> |

Table S2. Cont.

| M13 profile | Strain with the same profile                    | Representative strain | GenBank accession no. | Closet specie (GenBank accession no.)                                                          | Nucleotide substitutions/gap/total nt | % identity     | Identification                                                           |
|-------------|-------------------------------------------------|-----------------------|-----------------------|------------------------------------------------------------------------------------------------|---------------------------------------|----------------|--------------------------------------------------------------------------|
|             | DMKU-                                           | DMKU-                 |                       |                                                                                                |                                       |                |                                                                          |
| 46          | CP619                                           | CP619                 | LC428203              | <i>Kwoniella bestiolae</i> (FJ534903)                                                          | 0/0/559                               | 100            | <i>Kwoniella bestiolae</i>                                               |
| 47          | CP820                                           | CP820                 | LC428204              | <i>Kwoniella heveanensis</i> (AF075467)                                                        | 1/0/557                               | 99.82          | <i>Kwoniella heveanensis</i>                                             |
| 48          | CP611, CP634, CP760                             | CP611<br>CP760        | LC428255<br>LC428259  | <i>Papiliotrema flavescens</i> (AB035042)<br><i>Papiliotrema flavescens</i> (AB035042)         | 1/0/511<br>0/0/526                    | 99.81<br>100   | <i>Papiliotrema flavescens</i><br><i>Papiliotrema flavescens</i>         |
| 49          | CP642, CP700, CP720, CP734, CP740, CP786, CP808 | CP786                 | LC428261              | <i>Papiliotrema flavescens</i> (AB035042)                                                      | 0/0/530                               | 100            | <i>Papiliotrema flavescens</i>                                           |
| 50          | CP654, CP768                                    | CP654<br>CP768        | LC428256<br>LC428260  | <i>Papiliotrema flavescens</i> (AB035042)<br><i>Papiliotrema flavescens</i> (AB035042)         | 0/0/509<br>0/1/533                    | 100<br>99.81   | <i>Papiliotrema flavescens</i><br><i>Papiliotrema flavescens</i>         |
| 51          | CP714                                           | CP714                 | LC428257              | <i>Papiliotrema flavescens</i> (AB035042)                                                      | 0/0/511                               | 100            | <i>Papiliotrema flavescens</i>                                           |
| 52          | CP585, CP660                                    | CP585<br>CP660        | LC428262<br>LC428266  | <i>Papiliotrema laurentii</i> (AF075469)<br><i>Papiliotrema laurentii</i> (AF075469)           | 1/0/551<br>556/557                    | 99.82<br>99.82 | <i>Papiliotrema laurentii</i><br><i>Papiliotrema laurentii</i>           |
| 53          | CP560, CP567                                    | CP560<br>CP567        | LC428263<br>LC428264  | <i>Papiliotrema laurentii</i> (AF075469)<br><i>Papiliotrema laurentii</i> (AF075469)           | 1/0/551<br>513/514                    | 99.82<br>99.81 | <i>Papiliotrema laurentii</i><br><i>Papiliotrema laurentii</i>           |
| 54          | CP797                                           | CP797                 | LC428265              | <i>Papiliotrema laurentii</i> (AF075469)                                                       | 1/0/557                               | 99.82          | <i>Papiliotrema laurentii</i>                                            |
| 55          | CP691, CP823, CP592                             | CP691<br>CP592        | LC428268<br>LC428273  | <i>Papiliotrema rajasthanensis</i> (AM262324)<br><i>Papiliotrema rajasthanensis</i> (AM262324) | 0/0/556<br>1/0/577                    | 100<br>99.83   | <i>Papiliotrema rajasthanensis</i><br><i>Papiliotrema rajasthanensis</i> |
| 56          | CP776                                           | CP776                 | LC428269              | <i>Papiliotrema rajasthanensis</i> (AM262324)                                                  | 0/1/556                               | 99.82          | <i>Papiliotrema rajasthanensis</i>                                       |
| 57          | CP603, CP754, CP790, CP800                      | CP603<br>CP790        | LC428274<br>LC428270  | <i>Papiliotrema rajasthanensis</i> (AM262324)<br><i>Papiliotrema rajasthanensis</i> (AM262324) | 0/0/560<br>0/0/564                    | 100<br>100     | <i>Papiliotrema rajasthanensis</i><br><i>Papiliotrema rajasthanensis</i> |
| 58          | CP552, CP580                                    | CP552<br>CP580        | LC428271<br>LC428272  | <i>Papiliotrema rajasthanensis</i> (AM262324)<br><i>Papiliotrema rajasthanensis</i> (AM262324) | 1/0/577<br>0/0/577                    | 99.83<br>100   | <i>Papiliotrema rajasthanensis</i><br><i>Papiliotrema rajasthanensis</i> |

Table S2. Cont.

| M13 profile | Strain with the same profile                   | Representative strain            | GenBank accession no.                        | Closet specie (GenBank accession no.)                                                                                                                                        | Nucleotide substitutions/gap/total nt    | % identity               | Identification                                                                                                                   |
|-------------|------------------------------------------------|----------------------------------|----------------------------------------------|------------------------------------------------------------------------------------------------------------------------------------------------------------------------------|------------------------------------------|--------------------------|----------------------------------------------------------------------------------------------------------------------------------|
|             | DMKU-                                          | DMKU-                            |                                              |                                                                                                                                                                              |                                          |                          |                                                                                                                                  |
| 59          | CP621                                          | CP621                            | LC428267                                     | <i>Papiliotrema rajasthanensis</i> (AM262324)                                                                                                                                | 0/0/519                                  | 100                      | <i>Papiliotrema rajasthanensis</i>                                                                                               |
| 60          | CP781, CP818                                   | CP781<br>CP818                   | LC428275<br>LC428276                         | <i>Papiliotrema ruineniae</i> (LK023764)<br><i>Papiliotrema ruineniae</i> (LK023764)                                                                                         | 0/1/533<br>0/0/539                       | 99.81<br>100             | <i>Papiliotrema ruineniae</i><br><i>Papiliotrema ruineniae</i>                                                                   |
| 61          | CP806                                          | CP806                            | LC428277                                     | <i>Papiliotrema ruineniae</i> (LK023764)                                                                                                                                     | 0/0/510                                  | 100                      | <i>Papiliotrema ruineniae</i>                                                                                                    |
| 62          | CP801                                          | CP801                            | LC370335                                     | <i>Papiliotrema plantarum</i> (LC370335)                                                                                                                                     | 0/0/567                                  | 100                      | <i>Papiliotrema plantarum</i>                                                                                                    |
| 63          | CP620                                          | CP620                            | LC428278                                     | <i>Saitozyma flava</i> (AF075497)                                                                                                                                            | 1/0/537                                  | 99.81                    | <i>Saitozyma flava</i>                                                                                                           |
| 64          | CP758                                          | CP758                            | LC428279                                     | <i>Saitozyma flava</i> (AF075497)                                                                                                                                            | 1/0/545                                  | 99.82                    | <i>Saitozyma flava</i>                                                                                                           |
| 65          | CP557                                          | CP557                            | LC430175                                     | <i>Cystobasidium calyptogenae</i> (AB025996)                                                                                                                                 | 0/0/563                                  | 100                      | <i>Cystobasidium calyptogenae</i>                                                                                                |
| 66          | CP558                                          | CP558                            | LC430216                                     | <i>Symmetrospora vermiculata</i> (AB279731)                                                                                                                                  | 0/0/563                                  | 100                      | <i>Symmetrospora vermiculata</i>                                                                                                 |
| 67          | CP771                                          | CP771                            | LC430217                                     | <i>Symmetrospora vermiculata</i> (AB279731)                                                                                                                                  | 0/0/484                                  | 100                      | <i>Symmetrospora vermiculata</i>                                                                                                 |
| 68          | CP821                                          | CP821                            | LC430218                                     | <i>Symmetrospora vermiculata</i> (AB279731)                                                                                                                                  | 0/0/542                                  | 100                      | <i>Symmetrospora vermiculata</i>                                                                                                 |
| 69          | CP573                                          | CP573                            | LC430182                                     | <i>Rhodotorula mucilaginosa</i> (NG_055716)                                                                                                                                  | 1/0/555                                  | 99.82                    | <i>Rhodotorula mucilaginosa</i>                                                                                                  |
| 70          | CP596                                          | CP596                            | LC430181                                     | <i>Rhodotorula mucilaginosa</i> (NG_055716)                                                                                                                                  | 0/1/539                                  | 99.81                    | <i>Rhodotorula mucilaginosa</i>                                                                                                  |
| 71          | CP572                                          | CP572                            | LC430183                                     | <i>Rhodotorula paludigena</i> (AF070424)                                                                                                                                     | 0/0/556                                  | 100                      | <i>Rhodotorula paludigena</i>                                                                                                    |
| 72          | CP604, CP640,<br>CP730, CP752,<br>CP746, CP757 | CP604<br>CP640<br>CP730<br>CP752 | LC430185<br>LC430188<br>LC430192<br>LC430193 | <i>Rhodotorula paludigena</i> (AF070424)<br><i>Rhodotorula paludigena</i> (AF070424)<br><i>Rhodotorula paludigena</i> (AF070424)<br><i>Rhodotorula paludigena</i> (AF070424) | 0/0/476<br>0/0/515<br>0/0/512<br>0/0/475 | 100<br>100<br>100<br>100 | <i>Rhodotorula paludigena</i><br><i>Rhodotorula paludigena</i><br><i>Rhodotorula paludigena</i><br><i>Rhodotorula paludigena</i> |
| 73          | CP591                                          | CP591                            | LC430184                                     | <i>Rhodotorula paludigena</i> (AF070424)                                                                                                                                     | 0/0/558                                  | 100                      | <i>Rhodotorula paludigena</i>                                                                                                    |
| 74          | CP614, CP650,<br>CP785                         | CP614<br>CP650                   | LC430186<br>LC430190                         | <i>Rhodotorula paludigena</i> (AF070424)<br><i>Rhodotorula paludigena</i> (AF070424)                                                                                         | 0/0/521<br>0/0/525                       | 100<br>100               | <i>Rhodotorula paludigena</i><br><i>Rhodotorula paludigena</i>                                                                   |



Table S2. Cont.

| M13 profile | Strain with the same profile      | Representative strain            | GenBank accession no.                        | Closest specie (GenBank accession no.)                                                                                                                                       | Nucleotide substitutions/gap/total nt    | % identity                       | Identification                                                                                                                                           |
|-------------|-----------------------------------|----------------------------------|----------------------------------------------|------------------------------------------------------------------------------------------------------------------------------------------------------------------------------|------------------------------------------|----------------------------------|----------------------------------------------------------------------------------------------------------------------------------------------------------|
|             | DMKU-                             | DMKU-                            |                                              |                                                                                                                                                                              |                                          |                                  |                                                                                                                                                          |
| 74          |                                   | CP785                            | LC430195                                     | <i>Rhodotorula paludigena</i> (AF070424)                                                                                                                                     | 0/0/525                                  | 100                              | <i>Rhodotorula paludigena</i>                                                                                                                            |
| 75          | CP625                             | CP625                            | LC430187                                     | <i>Rhodotorula paludigena</i> (AF070424)                                                                                                                                     | 0/0/541                                  | 100                              | <i>Rhodotorula paludigena</i>                                                                                                                            |
| 76          | CP659                             | CP659                            | LC430191                                     | <i>Rhodotorula paludigena</i> (AF070424)                                                                                                                                     | 0/0/525                                  | 100                              | <i>Rhodotorula paludigena</i>                                                                                                                            |
| 77          | CP645, CP693, CP702, CP777, CP794 | CP645<br>CP702<br>CP794          | LC430189<br>LC430194<br>LC430196             | <i>Rhodotorula paludigena</i> (AF070424)<br><i>Rhodotorula paludigena</i> (AF070424)<br><i>Rhodotorula paludigena</i> (AF070424)                                             | 0/0/487<br>0/0/525<br>0/0/521            | 100<br>100<br>100                | <i>Rhodotorula paludigena</i><br><i>Rhodotorula paludigena</i><br><i>Rhodotorula paludigena</i>                                                          |
| 78          | CP570, CP639, CP690, CP699        | CP570<br>CP639<br>CP690<br>CP699 | LC431632<br>LC431633<br>LC428194<br>LC430199 | <i>Rhodotorula toruloides</i> (AF070426)<br><i>Rhodotorula toruloides</i> (AF070426)<br><i>Rhodotorula toruloides</i> (AF070426)<br><i>Rhodotorula toruloides</i> (AF070426) | 5/0/581<br>5/0/547<br>1/0/518<br>1/0/488 | 99.14<br>99.08<br>99.81<br>99.81 | <i>Rhodotorula</i> aff. <i>toruloides</i><br><i>Rhodotorula</i> aff. <i>toruloides</i><br><i>Rhodotorula toruloides</i><br><i>Rhodotorula toruloides</i> |
| 79          | CP589                             | CP589                            | LC430177                                     | <i>Rhodospiridiobolus nylandii</i> (AF387123)                                                                                                                                | 0/1/522                                  | 99.81                            | <i>Rhodospiridiobolus nylandii</i>                                                                                                                       |
| 80          | CP694, CP706, CP713               | CP694<br>CP706<br>CP713          | LC430178<br>LC430179<br>LC430180             | <i>Rhodospiridiobolus ruineniae</i> (AF070434)<br><i>Rhodospiridiobolus ruineniae</i> (AF070434)<br><i>Rhodospiridiobolus ruineniae</i> (AF070434)                           | 0/0/524<br>1/0/520<br>0/0/456            | 100<br>99.81<br>100              | <i>Rhodospiridiobolus ruineniae</i><br><i>Rhodospiridiobolus ruineniae</i><br><i>Rhodospiridiobolus ruineniae</i>                                        |
| 81          | CP658                             | CP658                            | LC430176                                     | <i>Rhodospiridiobolus fluvialis</i> (AF070422)                                                                                                                               | 1/0/539                                  | 99.81                            | <i>Rhodospiridiobolus fluvialis</i>                                                                                                                      |
| 82          | CP622                             | CP622                            | LC430215                                     | <i>Rhodospiridiobolus odoratus</i> (AF387125)                                                                                                                                | 1/0/509                                  | 99.80                            | <i>Rhodospiridiobolus odoratus</i>                                                                                                                       |
| 83          | CP551, CP601, CP683               | CP551<br>CP601<br>CP683          | LC430200<br>LC430202<br>LC430203             | <i>Sporobolomyces blumeae</i> (AY213010)<br><i>Sporobolomyces blumeae</i> (AY213010)<br><i>Sporobolomyces blumeae</i> (AY213010)                                             | 0/0/530<br>0/0/496<br>0/1/487            | 100<br>100<br>99.79              | <i>Sporobolomyces blumeae</i><br><i>Sporobolomyces blumeae</i><br><i>Sporobolomyces blumeae</i>                                                          |
| 84          | CP613, CP779                      | CP613<br>CP779                   | LC430205<br>LC430206                         | <i>Sporobolomyces blumeae</i> (AY213010)<br><i>Sporobolomyces blumeae</i> (AY213010)                                                                                         | 0/1/471<br>0/1/520                       | 99.79<br>99.81                   | <i>Sporobolomyces blumeae</i><br><i>Sporobolomyces blumeae</i>                                                                                           |
| 85          | CP575, CP605                      | CP575<br>CP605                   | LC430201<br>LC430204                         | <i>Sporobolomyces blumeae</i> (AY213010)<br><i>Sporobolomyces blumeae</i> (AY213010)                                                                                         | 0/0/530<br>0/1/492                       | 100<br>99.81                     | <i>Sporobolomyces blumeae</i><br><i>Sporobolomyces blumeae</i>                                                                                           |

Table S2. Cont.

| M13 profile | Strain with the same profile             | Representative strain | GenBank accession no. | Closest specie (GenBank accession no.)      | Nucleotide substitutions/gap/total nt | % identity | Identification                   |
|-------------|------------------------------------------|-----------------------|-----------------------|---------------------------------------------|---------------------------------------|------------|----------------------------------|
|             | DMKU-                                    | DMKU-                 |                       |                                             |                                       |            |                                  |
| 86          | CP741, CP751, CP762                      | CP741                 | LC430211              | <i>Sporobolomyces nakasei</i> (KY109757)    | 1/0/511                               | 99.81      | <i>Sporobolomyces nakasei</i>    |
|             |                                          | CP751                 | LC430212              | <i>Sporobolomyces nakasei</i> (KY109757)    | 1/0/510                               | 99.81      | <i>Sporobolomyces nakasei</i>    |
|             |                                          | CP762                 | LC430214              | <i>Sporobolomyces nakasei</i> (KY109757)    | 0/0/511                               | 100        | <i>Sporobolomyces nakasei</i>    |
| 87          | CP727, CP735, CP756                      | CP727                 | LC430209              | <i>Sporobolomyces nakasei</i> (KY109757)    | 1/0/715                               | 99.81      | <i>Sporobolomyces nakasei</i>    |
|             |                                          | CP735                 | LC430210              | <i>Sporobolomyces nakasei</i> (KY109757)    | 1/0/715                               | 99.81      | <i>Sporobolomyces nakasei</i>    |
|             |                                          | CP756                 | LC430213              | <i>Sporobolomyces nakasei</i> (KY109757)    | 0/0/511                               | 100        | <i>Sporobolomyces nakasei</i>    |
| 88          | CP799                                    | CP799                 | LC430208              | <i>Sporobolomyces carnicolor</i> (AY070008) | 0/0/458                               | 100        | <i>Sporobolomyces carnicolor</i> |
| 89          | CP623, CP675, CP784, CP809               | CP675                 | LC430821              | <i>Anthracocystis elionuri</i> (AY740157)   | 1/0/544                               | 99.82      | <i>Anthracocystis elionuri</i>   |
|             |                                          | CP784                 | LC430822              | <i>Anthracocystis elionuri</i> (AY740157)   | 0/0/558                               | 100        | <i>Anthracocystis elionuri</i>   |
|             |                                          | CP809                 | LC430823              | <i>Anthracocystis elionuri</i> (AY740157)   | 0/0/555                               | 100        | <i>Anthracocystis elionuri</i>   |
| 90          | CP646, CP824                             | CP646                 | LC430820              | <i>Anthracocystis elionuri</i> (AY740157)   | 0/0/555                               | 100        | <i>Anthracocystis elionuri</i>   |
| 91          | CP554, CP583, CP593, CP617, CP638, CP778 | CP554                 | LC430825              | <i>Dirkmeia churashimaensis</i> (AB548955)  | 0/0/531                               | 100        | <i>Dirkmeia churashimaensis</i>  |
|             |                                          | CP583                 | LC430829              | <i>Dirkmeia churashimaensis</i> (AB548955)  | 0/0/420                               | 100        |                                  |
|             |                                          | CP593                 | LC430830              | <i>Dirkmeia churashimaensis</i> (AB548955)  | 0/0/549                               | 100        |                                  |
|             |                                          | CP709                 | LC430833              | <i>Dirkmeia churashimaensis</i> (AB548955)  | 0/0/566                               | 100        |                                  |
| 92          | CP562, CP608, CP774                      | CP562                 | LC430826              | <i>Dirkmeia churashimaensis</i> (AB548955)  | 0/0/531                               | 100        | <i>Dirkmeia churashimaensis</i>  |
|             |                                          | CP608                 | LC430831              | <i>Dirkmeia churashimaensis</i> (AB548955)  | 0/0/551                               | 100        |                                  |
| 93          | CP574, CP644, CP653, CP692               | CP574                 | LC430827              | <i>Dirkmeia churashimaensis</i> (AB548955)  | 0/0/531                               | 100        | <i>Dirkmeia churashimaensis</i>  |
| 94          | CP612, CP661, CP815                      | CP612                 | LC430832              | <i>Dirkmeia churashimaensis</i> (AB548955)  | 0/0/540                               | 100        | <i>Dirkmeia churashimaensis</i>  |
|             |                                          | CP815                 | LC430828              | <i>Dirkmeia churashimaensis</i> (AB548955)  | 0/0/556                               | 100        | <i>Dirkmeia churashimaensis</i>  |
| 95          | CP556, CP681, CP684                      | CP681                 | LC430834              | <i>Moesziomyces antarcticus</i> (JN940521)  | 0/0/545                               | 100        | <i>Moesziomyces antarcticus</i>  |
|             |                                          | CP684                 | LC430835              | <i>Moesziomyces antarcticus</i> (JN940521)  | 0/0/544                               | 100        | <i>Moesziomyces antarcticus</i>  |

Table S2. Cont.

| M13 profile | Strain with the same profile                    | Representative strain            | GenBank accession no.                        | Closest specie (GenBank accession no.)                                                                                                           | Nucleotide substitutions/gap/total nt    | % identity                   | Identification                                                                                       |
|-------------|-------------------------------------------------|----------------------------------|----------------------------------------------|--------------------------------------------------------------------------------------------------------------------------------------------------|------------------------------------------|------------------------------|------------------------------------------------------------------------------------------------------|
|             | DMKU-                                           | DMKU-                            |                                              |                                                                                                                                                  |                                          |                              |                                                                                                      |
| 96          | CP564, CP624, CP671, CP697, CP745, CP726, CP770 | CP697                            | LC430836                                     | <i>Moesziomyces antarcticus</i> (JN940521)                                                                                                       | 0/0/545                                  | 100                          | <i>Moesziomyces antarcticus</i>                                                                      |
| 97          | CP626, CP641                                    | CP626<br>CP641                   | LC430837<br>LC430838                         | <i>Ustilago trichophora</i> (AY740125)<br><i>Ustilago trichophora</i> (AY740125)                                                                 | 0/0/567<br>0/0/505                       | 100<br>100                   | <i>Ustilago trichophora</i><br><i>Ustilago trichophora</i>                                           |
| 98          | CP597                                           | CP597                            | LC430839                                     | <i>Ustilago siamensis</i> (AB117963)                                                                                                             | 0/1/536                                  | 99.81                        | <i>Ustilago siamensis</i>                                                                            |
| 99          | CP569, CP579, CP607, CP615, CP663, CP798        | CP569<br>CP579<br>CP663<br>CP798 | LC430840<br>LC430845<br>LC430846<br>LC430844 | <i>Ustilago sparsa</i> (JN367335)<br><i>Ustilago sparsa</i> (JN367335)<br><i>Ustilago sparsa</i> (JN367335)<br><i>Ustilago sparsa</i> (JN367335) | 0/0/529<br>0/0/490<br>2/0/556<br>1/0/559 | 100<br>100<br>99.64<br>99.82 | <i>Ustilago sparsa</i><br><i>Ustilago sparsa</i><br><i>Ustilago sparsa</i><br><i>Ustilago sparsa</i> |
| 100         | CP584, CP704, CP814 CP732                       | CP584<br>CP732                   | LC430841<br>LC430843                         | <i>Ustilago sparsa</i> (JN367335)                                                                                                                | 0/0/494<br>0/0/550                       | 100<br>100                   | <i>Ustilago sparsa</i><br><i>Ustilago sparsa</i>                                                     |
| 101         | CP602, CP698, CP725                             | CP698                            | LC430842                                     | <i>Ustilago sparsa</i> (JN367335)                                                                                                                | 0/0/529                                  | 100                          | <i>Ustilago sparsa</i>                                                                               |

**Table S3.** Sequence similarity analysis of the ITS region of corn phylloplane isolates showing  $\geq 2$  nucleotide substitutions in the D1/D2 region

| Isolate    | GenBank accession no.<br>of D1/D2, ITS region | Closest species                                                              | Nucleotide substitutions/<br>gap/total nt |            | Identification                                                     |
|------------|-----------------------------------------------|------------------------------------------------------------------------------|-------------------------------------------|------------|--------------------------------------------------------------------|
|            |                                               |                                                                              | D1/D2 region                              | ITS region |                                                                    |
| DMKU-CP570 | LC431632, LC431624                            | <i>Rhodotorula toruloides</i> CBS 349 (AF070426, AF444489)                   | 5/0/581                                   | 5/4/584    | Potential new species closest to <i>Rhodotorula toruloides</i>     |
| DMKU-CP639 | LC431633, LC431626                            | <i>Rhodotorula toruloides</i> CBS 349 (AF070426, AF444489)                   | 5/0/547                                   | 5/4/584    | Potential new species closest to <i>Rhodotorula toruloides</i>     |
| DMKU-CP576 | LC370333, LC431625                            | <i>Vishniacozyma heimaeyensis</i> CBS 8933 <sup>T</sup> (DQ000317, KF036591) | 10/1/562                                  | 19/11/492  | Potential new species closest to <i>Vishniacozyma heimaeyensis</i> |
| DMKU-CP796 | LC370334, LC431630                            | <i>Vishniacozyma heimaeyensis</i> CBS 8933 <sup>T</sup> (DQ000317, KF036591) | 10/1/562                                  | 19/11/492  | Potential new species closest to <i>Vishniacozyma heimaeyensis</i> |

**Table S4.** Similarity coefficient between yeast communities in pairwise comparisons based on the Jaccard similarity index.

|            | S1   | S2   | S3   | S4   | S5   | S6   | S7   | S8   | S9   | S10  | S11  | S12  | S13  | S14  | S15  |
|------------|------|------|------|------|------|------|------|------|------|------|------|------|------|------|------|
| <b>S1</b>  | 1.00 |      |      |      |      |      |      |      |      |      |      |      |      |      |      |
| <b>S2</b>  | 0.32 | 1.00 |      |      |      |      |      |      |      |      |      |      |      |      |      |
| <b>S3</b>  | 0.29 | 0.40 | 1.00 |      |      |      |      |      |      |      |      |      |      |      |      |
| <b>S4</b>  | 0.29 | 0.24 | 0.36 | 1.00 |      |      |      |      |      |      |      |      |      |      |      |
| <b>S5</b>  | 0.22 | 0.23 | 0.33 | 0.25 | 1.00 |      |      |      |      |      |      |      |      |      |      |
| <b>S6</b>  | 0.24 | 0.20 | 0.28 | 0.22 | 0.32 | 1.00 |      |      |      |      |      |      |      |      |      |
| <b>S7</b>  | 0.12 | 0.13 | 0.22 | 0.00 | 0.13 | 0.11 | 1.00 |      |      |      |      |      |      |      |      |
| <b>S8</b>  | 0.18 | 0.32 | 0.38 | 0.15 | 0.20 | 0.23 | 0.15 | 1.00 |      |      |      |      |      |      |      |
| <b>S9</b>  | 0.47 | 0.29 | 0.33 | 0.39 | 0.44 | 0.21 | 0.06 | 0.20 | 1.00 |      |      |      |      |      |      |
| <b>S10</b> | 0.35 | 0.24 | 0.46 | 0.33 | 0.32 | 0.27 | 0.14 | 0.28 | 0.39 | 1.00 |      |      |      |      |      |
| <b>S11</b> | 0.37 | 0.19 | 0.29 | 0.44 | 0.26 | 0.29 | 0.00 | 0.10 | 0.33 | 0.35 | 1.00 |      |      |      |      |
| <b>S12</b> | 0.18 | 0.19 | 0.50 | 0.13 | 0.20 | 0.31 | 0.29 | 0.33 | 0.20 | 0.42 | 0.14 | 1.00 |      |      |      |
| <b>S13</b> | 0.15 | 0.10 | 0.25 | 0.11 | 0.24 | 0.14 | 0.20 | 0.27 | 0.17 | 0.33 | 0.12 | 0.18 | 1.00 |      |      |
| <b>S14</b> | 0.18 | 0.19 | 0.29 | 0.21 | 0.50 | 0.29 | 0.15 | 0.29 | 0.33 | 0.35 | 0.16 | 0.23 | 0.19 | 1.00 |      |
| <b>S15</b> | 0.18 | 0.19 | 0.29 | 0.28 | 0.33 | 0.29 | 0.15 | 0.29 | 0.26 | 0.35 | 0.22 | 0.33 | 0.19 | 0.57 | 1.00 |
